# Supplementary material for: Antiproliferative and antimetabolic effects behind the anticancer property of fermented wheat germ extract
Source: Springer Nature journal article supplement (doi:10.1186/s12906-016-1138-5), 2016-05-31

BxPC-3

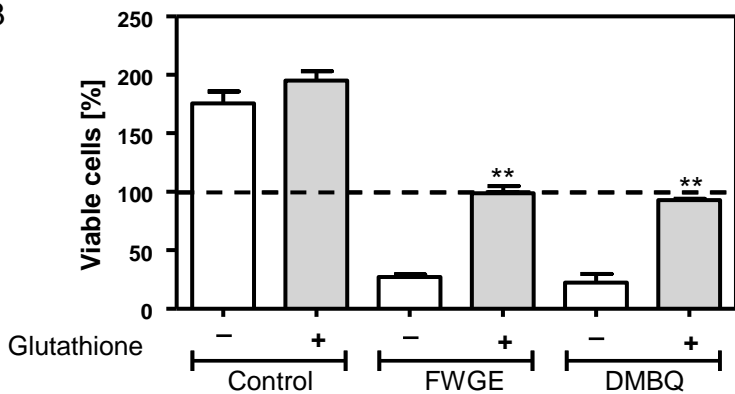

23132/87

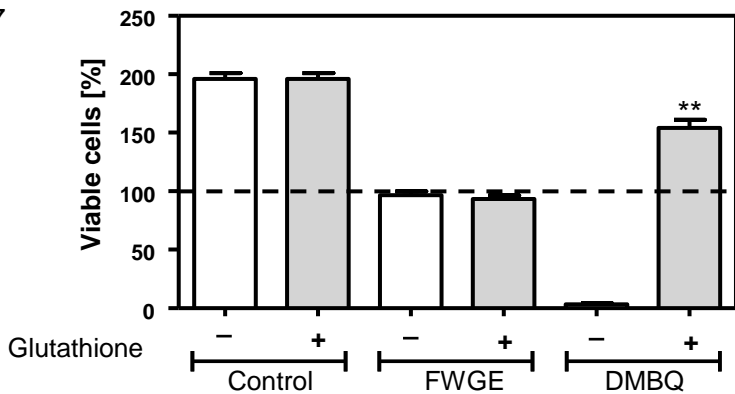

HRT-18

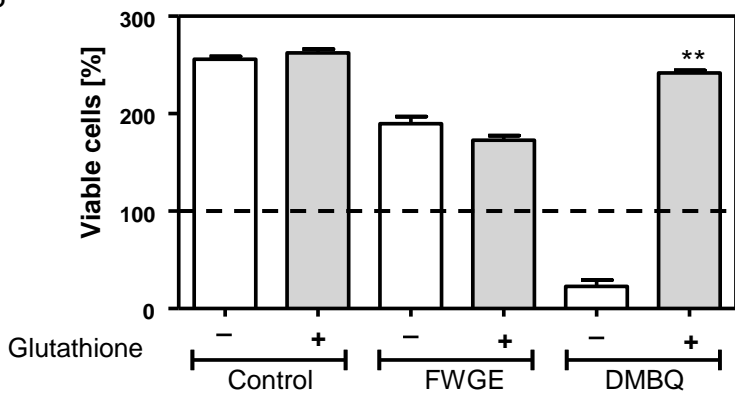

Supplement: MOESM2 [file 10244254]
