# Supplementary material for: Antiproliferative and antimetabolic effects behind the anticancer property of fermented wheat germ extract
Source: Springer Nature journal article supplement (doi:10.1186/s12906-016-1138-5), 2016-05-31
Supplement: MOESM3 [file 10244254]

DT-diaphorase

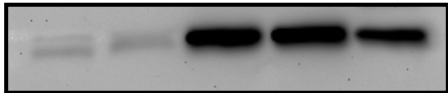

$\beta$ -Actin

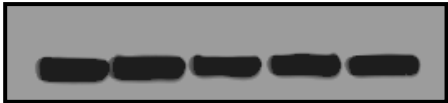

ASPC-1

BxPC-3

23132/87

HRT-18

NHDF
