# Supplementary material for: Antiproliferative and antimetabolic effects behind the anticancer property of fermented wheat germ extract
Source: Springer Nature journal article supplement (doi:10.1186/s12906-016-1138-5), 2016-05-31

**A** 23132/87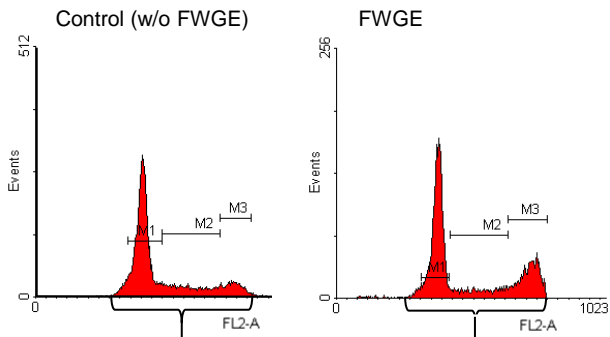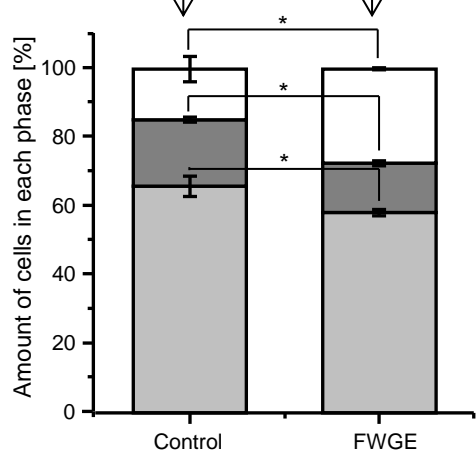

G2/M      S      G0/G1

**B** HRT-18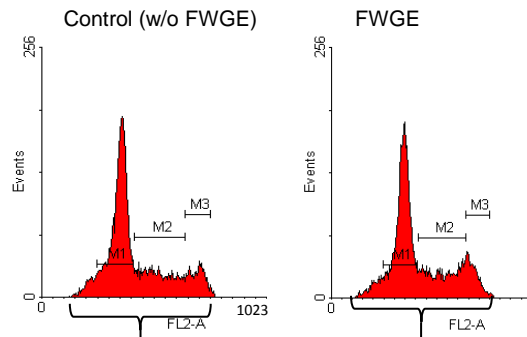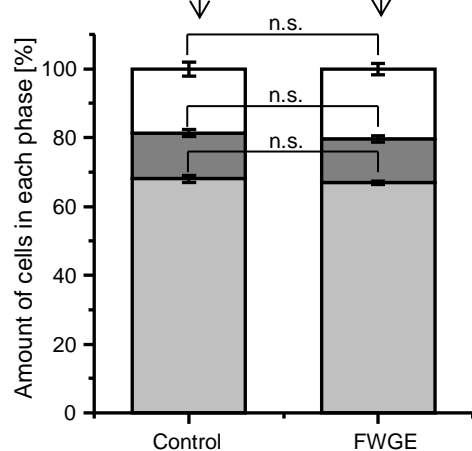

Supplement: MOESM4 [file 10244254]
